# Supplementary material
Source: PubMed Central journal article supplement (PMC9194920)
Supplement: NIHMS1811299-supplement-Supplemental_Data.pdf [file NIHMS1811299-supplement-Supplemental_Data.pdf]

Post-Acute Pancreatitis Pancreatic Exocrine Insufficiency  
*Rationale and Methodology of a Prospective, Observational,  
Multicenter Cohort Study*

**SUPPLEMENTAL DIGITAL CONTENT**

|                                                                       |       |
|-----------------------------------------------------------------------|-------|
| 1. Supplemental Digital Content 1 – Baseline Questionnaire.....       | 2–17  |
| 2. Supplemental Digital Content 2 – Follow-up Questionnaire.....      | 18–33 |
| 3. Supplemental Digital Content 3 – PAPPEI Study Lab Procedures ..... | 34–37 |

|                                                                                                                                                      |                     |                                                                                                                                                                             |
|------------------------------------------------------------------------------------------------------------------------------------------------------|---------------------|-----------------------------------------------------------------------------------------------------------------------------------------------------------------------------|
| <b>Main Form</b>                                                                                                                                     | <b>Page 1 of 16</b> | <b>PAPPEI</b>                                                                                                                                                               |
| <input type="text"/> <input type="text"/> <input type="text"/> - <input type="text"/> <input type="text"/> <input type="text"/> <input type="text"/> |                     | <input type="text"/> <input type="text"/> / <input type="text"/> <input type="text"/> / <input type="text"/> <input type="text"/> <input type="text"/> <input type="text"/> |
| Initials                                                                                                                                             | Patient ID          | Date of Birth (Month/Date/Year)                                                                                                                                             |

|                                                                                                                                                                                                                          |
|--------------------------------------------------------------------------------------------------------------------------------------------------------------------------------------------------------------------------|
| <b>Date of Enrollment:</b> <input type="text"/> <input type="text"/> / <input type="text"/> <input type="text"/> / <input type="text"/> <input type="text"/> <input type="text"/> <input type="text"/> (Month/Date/Year) |
| <b>Proof ID:</b> <input type="text"/> <input type="text"/> <input type="text"/> <input type="text"/>                                                                                                                     |
| <b>APPRENTICE ID:</b> <input type="text"/> <input type="text"/> <input type="text"/> <input type="text"/>                                                                                                                |
| <b>PAPPEI ID:</b> <input type="text"/> <input type="text"/> <input type="text"/> <input type="text"/>                                                                                                                    |

## 2. Inclusion/Exclusion Criteria, Time points

**2.1 Inclusion Criteria: Include the subject if the answers to at least two of the following three questions are "yes"**

- Is serum amylase or lipase of the subject elevated greater than 3× upper limit of normal?
- Does the subject complain of acute-onset upper abdominal pain (new pain or getting worse than baseline pain)?
- Does abdominal imaging studies demonstrate pancreatic edema, peripancreatic fat stranding, or complications of acute pancreatitis?

**2.2 Exclusion Criteria: Exclude the subject if any of the answers to following 5 questions is "yes"**

Please, record all cases that were excluded.

- Is the subject less than 18 years old?  Yes  No
- Is the subject, or subject's proxy, unwilling to provide consent?  Yes  No
- Does the subject have known history or imaging of chronic pancreatitis (imaging findings include, but not limited to, pancreatic calcifications or atrophy)?  Yes  No
- Is the subject diagnosed with exocrine pancreatic insufficiency before enrollment?  Yes  No
- Did pancreatitis occur due to abdominal trauma or surgery?  Yes  No
- Does the subject have pancreatic cancer?  Yes  No
- Yes  No
- Is the patient incarcerated?  Yes  No
- Anticipated inability to follow study's protocol  Yes  No

Please write the explanation for excluding the patient if not mentioned in the above questions:

|                      |                      |                      |   |                      |                      |                      |                      |
|----------------------|----------------------|----------------------|---|----------------------|----------------------|----------------------|----------------------|
| <input type="text"/> | <input type="text"/> | <input type="text"/> | - | <input type="text"/> | <input type="text"/> | <input type="text"/> | <input type="text"/> |
|----------------------|----------------------|----------------------|---|----------------------|----------------------|----------------------|----------------------|

Initials

Patient ID

|                      |                      |   |                      |                      |   |                      |                      |                      |                      |
|----------------------|----------------------|---|----------------------|----------------------|---|----------------------|----------------------|----------------------|----------------------|
| <input type="text"/> | <input type="text"/> | / | <input type="text"/> | <input type="text"/> | / | <input type="text"/> | <input type="text"/> | <input type="text"/> | <input type="text"/> |
|----------------------|----------------------|---|----------------------|----------------------|---|----------------------|----------------------|----------------------|----------------------|

Date of Birth (Month/Date/Year)

## 2. Anthropometric Measurements

2.1 Current Weight: \_\_\_\_\_ lbs

2.2 Height: \_\_\_\_\_ ft \_\_\_\_\_ inches

2.3 BMI (Body Mass Index) = \_\_\_\_\_

2.4 Unintentional Weight Loss (past 6 months) Yes No

2.4.1 If answer to 2.4.1 is "YES", how much weight loss: \_\_\_\_\_

2.5 Current Waist Size: \_\_\_\_\_ (inches)

2.6 Waist-Hip Ratio: \_\_\_\_\_

(Waist circumference is measured at a level midway between the lowest rib and the iliac crest. The tape measure is in a parallel to the floor and was snugged without compressing the skin. The hip circumference is measured using the same measuring tape at its widest portion of the buttocks with tape parallel to the floor)

2.7 Mid-arm muscle circumference: \_\_\_\_\_ (inches)

## 3. Demographics

3.1 Age: \_\_\_\_\_

3.2 Gender (at birth):  Female  Male  Other

### 3.3 Ethnicity

Hispanic or Latino\*

Not Hispanic or Latino

\* Hispanic or Latino is a person of Cuban, Mexican, Puerto Rican, South or Central American, or other Spanish culture or origin, regardless of race.

|                      |                      |                      |   |                      |                      |                      |                      |
|----------------------|----------------------|----------------------|---|----------------------|----------------------|----------------------|----------------------|
| <input type="text"/> | <input type="text"/> | <input type="text"/> | - | <input type="text"/> | <input type="text"/> | <input type="text"/> | <input type="text"/> |
|----------------------|----------------------|----------------------|---|----------------------|----------------------|----------------------|----------------------|

Initials

Patient ID

|                      |                      |   |                      |                      |   |                      |                      |                      |                      |
|----------------------|----------------------|---|----------------------|----------------------|---|----------------------|----------------------|----------------------|----------------------|
| <input type="text"/> | <input type="text"/> | / | <input type="text"/> | <input type="text"/> | / | <input type="text"/> | <input type="text"/> | <input type="text"/> | <input type="text"/> |
|----------------------|----------------------|---|----------------------|----------------------|---|----------------------|----------------------|----------------------|----------------------|

Date of Birth (Month/Date/Year)

**3.4 Race:**

- American Indian/Alaska Native** (origins in any of the original peoples of North, Central, or South America, and who maintains tribal affiliations or community attachment)
- Asian** (origin in Far East, Southeast Asia, or the Indian subcontinent)
- Native Hawaiian or Other Pacific Islander** (e.g. Guam, Samoa)
- Black or African American** (origins in any of the black racial groups of Africa)
- White** (origin in Europe, the Middle East, or North Africa)
- Unknown** (Patient does not know or refuses to select the race)

**3.5 Education:**

What is the highest grade or level of schooling you completed?

- |                                                                                                   |                                                        |
|---------------------------------------------------------------------------------------------------|--------------------------------------------------------|
| <input type="checkbox"/> 8th grade or less                                                        | <input type="checkbox"/> Associate degree/Some college |
| <input type="checkbox"/> Less than high school graduate                                           | <input type="checkbox"/> Bachelor's degree             |
| <input type="checkbox"/> High school graduate/GED                                                 | <input type="checkbox"/> Graduate school               |
| <input type="checkbox"/> Post-high school training other college<br>(vocational/technical school) |                                                        |
| <input type="checkbox"/> Other, specify: _____                                                    |                                                        |

**3.6 Which of these categories best describes your total combined family income for the past 12 months?**

- |                                             |                                               |                                                |
|---------------------------------------------|-----------------------------------------------|------------------------------------------------|
| <input type="checkbox"/> <\$25,000          | <input type="checkbox"/> \$75,000-<\$100,000  | <input type="checkbox"/> I don't know/not sure |
| <input type="checkbox"/> \$25,000-<\$50,000 | <input type="checkbox"/> \$100,000-<\$150,000 |                                                |
| <input type="checkbox"/> \$50,000-<\$75,000 | <input type="checkbox"/> >\$150,000           |                                                |

**3.7 What is your employment status?**

- Employed for wages  Student  Retired  Self-employed
- Homemaker  Military  Unemployed, medical reason
- Unemployed, non-medical reason
- I don't know/not sure

**3.8 What is your marital status?**

- |                                   |                                    |
|-----------------------------------|------------------------------------|
| <input type="checkbox"/> Married  | <input type="checkbox"/> Separated |
| <input type="checkbox"/> Widowed  | <input type="checkbox"/> Single    |
| <input type="checkbox"/> Divorced |                                    |

I don't know/not sure

## 4. History of Present Illness (Acute Pancreatitis)

|            |                                                                                                                                                                                    |                                                                                                                                                                                                                          |
|------------|------------------------------------------------------------------------------------------------------------------------------------------------------------------------------------|--------------------------------------------------------------------------------------------------------------------------------------------------------------------------------------------------------------------------|
| <b>4.1</b> | <b>Date and Time of Pain Onset:</b><br><small>(Date and best estimate of time when the characteristic upper abdominal pain of acute pancreatitis started)</small>                  | <input type="text"/> <input type="text"/> / <input type="text"/> <input type="text"/> / <input type="text"/> <input type="text"/> <input type="text"/> <input type="text"/> at ____:____                                 |
| <b>4.2</b> | <b>Date and Time of Presentation to the hospital</b><br><small>(Date and best estimate of time of initial presentation to emergency room, or direct admission to hospital)</small> | <input type="text"/> <input type="text"/> / <input type="text"/> <input type="text"/> / <input type="text"/> <input type="text"/> <input type="text"/> <input type="text"/> at ____:____                                 |
| <b>4.3</b> | <b>Transfer</b><br><small>(Applies when the patient transfers from an OSH hospital where he/she initially presented to for further management)</small>                             | <input type="checkbox"/> Yes <input type="checkbox"/> No                                                                                                                                                                 |
| <b>4.4</b> | <b>If 4.3 is yes, date and Time of admission to the Study Site:</b>                                                                                                                | <input type="text"/> <input type="text"/> / <input type="text"/> <input type="text"/> / <input type="text"/> <input type="text"/> <input type="text"/> <input type="text"/> at ____:____                                 |
| <b>4.5</b> | <b>Date and Time of Enrollment to study:</b>                                                                                                                                       | <input type="text"/> <input type="text"/> / <input type="text"/> <input type="text"/> / <input type="text"/> <input type="text"/> <input type="text"/> <input type="text"/> at ____:____<br><input type="checkbox"/> N/A |

### 4.6 Acute Pancreatitis primary etiology

- Biliary  Idiopathic  
 Alcoholic  HTG  
 Post-ERCP (If yes: Date and Time of ERCP:   /   /     at \_\_\_\_:\_\_\_\_)  
 Other specify: \_\_\_\_\_

(Select the most prominent etiology. Idiopathic acute pancreatitis is confirmed when all common etiologies (gallstones, alcohol, post-ERCP, HTG, drug-induced) have been excluded; Primary hypertriglyceridemia-induced acute pancreatitis is confirmed when common etiologies have been excluded and serum triglycerides are >500 mg/dl)

**4.7 Is there a Secondary etiology?**  Yes  No

**4.7.1 If yes, what is the secondary etiology?**

- Biliary  Idiopathic  
 Alcoholic  HTG  
 Post-ERCP  
 (If yes: Date and Time of ERCP:   /   /     at \_\_\_\_:\_\_\_\_)  
 Other specify: \_\_\_\_\_

## 5. Patient's Medical History and Family History

**5.1 Have you previously had documented attacks of acute pancreatitis which required hospital admission?**  Yes  No  Uncertain

If answer to question 5.1 is "NO" or "UNCERTAIN", proceed to section 6.

|                      |                      |                      |   |                      |                      |                      |                      |
|----------------------|----------------------|----------------------|---|----------------------|----------------------|----------------------|----------------------|
| <input type="text"/> | <input type="text"/> | <input type="text"/> | - | <input type="text"/> | <input type="text"/> | <input type="text"/> | <input type="text"/> |
|----------------------|----------------------|----------------------|---|----------------------|----------------------|----------------------|----------------------|

Initials

Patient ID

|                      |                      |   |                      |                      |   |                      |                      |                      |                      |
|----------------------|----------------------|---|----------------------|----------------------|---|----------------------|----------------------|----------------------|----------------------|
| <input type="text"/> | <input type="text"/> | / | <input type="text"/> | <input type="text"/> | / | <input type="text"/> | <input type="text"/> | <input type="text"/> | <input type="text"/> |
|----------------------|----------------------|---|----------------------|----------------------|---|----------------------|----------------------|----------------------|----------------------|

Date of Birth (Month/Date/Year)

If answer to question 5.1 is "YES" answer questions 5.1.1 to 5.1.5

- **5.1.1** date of your first attack of acute pancreatitis? \_\_\_\_/\_\_\_\_/\_\_\_\_  
 ➤ **5.1.2** How many previous hospitalizations due to attacks of acute pancreatitis have you had?

 1  
 2

 3  
 4

 5 or more  
 Uncertain

- **5.1.3** How long ago did you have your last attack? \_\_\_\_ years \_\_\_\_ months  
 ➤ **5.1.4** During any of your previous pancreatitis attacks, was any of the following present?

 Organ failure  
 Pancreatic necrosis  
 Fluid collection

 Walled-off necrosis  
 None of the above  
 Uncertain

- **5.1.5** During any of your previous pancreatitis attacks, was any of the following needed?

 Intensive care unit admission

If Yes, duration of ICU stay: \_\_\_\_ days or  Uncertain

 Parenteral nutrition (TPN) If Yes, duration of TPN: \_\_\_\_ days or  Uncertain

 Tube feedings: \_\_\_\_ days or  Uncertain

 Percutaneous, endoscopic or surgical drainage or debridement

 None of the above

 Uncertain

## 5.2 Past Medical History

(Data to be retrieved by the research team through interview and EMR)

5.2.1 Has the subject had any of the following conditions?

| Disease                                         | Yes | No | Uncertain |
|-------------------------------------------------|-----|----|-----------|
| Pre-existing High triglycerides (TG >150 mg/dL) |     |    |           |

Baseline TG: \_\_\_\_ mg/dL

|          |  |  |  |
|----------|--|--|--|
| Diabetes |  |  |  |
|----------|--|--|--|

Specify type:  1  2

Specify treatment:  Diet  Oral antidiabetics  Insulin

|                                        |  |  |  |
|----------------------------------------|--|--|--|
| If diabetic, is there end-organ damage |  |  |  |
|----------------------------------------|--|--|--|

Define end organ damage:  Retinopathy,  Neuropathy,  Nephropathy, or

Brittle Diabetes \_\_\_\_\_

|                                                       |  |  |  |
|-------------------------------------------------------|--|--|--|
| Myocardial infarction (history, not ECG changes only) |  |  |  |
| Congestive Heart Failure                              |  |  |  |

|                      |                      |                      |   |                      |                      |                      |                      |
|----------------------|----------------------|----------------------|---|----------------------|----------------------|----------------------|----------------------|
| <input type="text"/> | <input type="text"/> | <input type="text"/> | - | <input type="text"/> | <input type="text"/> | <input type="text"/> | <input type="text"/> |
|----------------------|----------------------|----------------------|---|----------------------|----------------------|----------------------|----------------------|

Initials

Patient ID

|                      |                      |   |                      |                      |   |                      |                      |                      |                      |
|----------------------|----------------------|---|----------------------|----------------------|---|----------------------|----------------------|----------------------|----------------------|
| <input type="text"/> | <input type="text"/> | / | <input type="text"/> | <input type="text"/> | / | <input type="text"/> | <input type="text"/> | <input type="text"/> | <input type="text"/> |
|----------------------|----------------------|---|----------------------|----------------------|---|----------------------|----------------------|----------------------|----------------------|

Date of Birth (Month/Date/Year)

|                                                                                                                                                                                             |  |  |  |
|---------------------------------------------------------------------------------------------------------------------------------------------------------------------------------------------|--|--|--|
| Peripheral Vascular Disease (History of intermittent claudication, peripheral arterial bypass for insufficiency, gangrene, acute arterial insufficiency, untreated aortic aneurysm (>=6cm)) |  |  |  |
| Cerebrovascular disease (History of Transient Ischemic Attack (TIA), or Cerebral Vascular Attack (stroke) with no or minor sequelae)                                                        |  |  |  |
| Hemiplegia or paraplegia (Hemiplegia means impairment in motor function of one side of the body. Paraplegia means impairment in motor function of lower extremities.)                       |  |  |  |
| Dementia (Chronic cognitive deficit, e.g. Mini-Mental Status Exam(MMSE) ≤26)                                                                                                                |  |  |  |
| Chronic Pulmonary Disease (e.g. COPD, asthma, pulmonary fibrosis)                                                                                                                           |  |  |  |
| Connective Tissue disease (e.g. lupus, rheumatoid arthritis, polymyositis, etc.)                                                                                                            |  |  |  |

Specify the type of connective tissue disease:

|                                                                                                                                               |  |  |  |
|-----------------------------------------------------------------------------------------------------------------------------------------------|--|--|--|
| Peptic Ulcer Disease                                                                                                                          |  |  |  |
| Mild liver disease (chronic liver disease with/without compensated cirrhosis. E.g. chronic viral hepatitis, steatohepatitis, autoimmune)      |  |  |  |
| Moderate or severe liver disease (decompensated cirrhosis defined by presence of ascites, encephalopathy, or history of variceal bleeding)    |  |  |  |
| Mild renal disease (creatinine >1.5 mg/dL and less than 3 mg/dL)                                                                              |  |  |  |
| Moderate or severe renal disease (creatinine > 3 mg/dL, history of renal transplantation, history of dialysis or history of uremic syndrome)  |  |  |  |
| Solid tumor without metastases (diagnosed within the last 5 years)                                                                            |  |  |  |
| Leukemia (e.g. chronic myeloid leukemia, chronic lymphocytic leukemia, acute myeloid leukemia, acute lymphocytic leukemia, polycythemia vera) |  |  |  |
| Lymphoma (including Non-Hodgkin, Hodgkin, Waldenstrom macroglobulinemia, Multiple Myeloma)                                                    |  |  |  |
| Metastatic solid tumor                                                                                                                        |  |  |  |
| AIDS (defined as confirmed positive Human Immunodeficiency Virus (HIV) test plus either CD4 count < 250 or any HIV-related complications)     |  |  |  |

### 5.2.2 Past Surgical History

| Procedure          | Yes | No | Age | # of times | Indication |
|--------------------|-----|----|-----|------------|------------|
| Pancreatic surgery |     |    |     |            |            |
| Gastric bypass     |     |    |     |            |            |
| Cholecystectomy    |     |    |     |            |            |
| Gastrectomy        |     |    |     |            |            |

|                      |                      |                      |   |                      |                      |                      |                      |
|----------------------|----------------------|----------------------|---|----------------------|----------------------|----------------------|----------------------|
| <input type="text"/> | <input type="text"/> | <input type="text"/> | - | <input type="text"/> | <input type="text"/> | <input type="text"/> | <input type="text"/> |
|----------------------|----------------------|----------------------|---|----------------------|----------------------|----------------------|----------------------|

Initials

Patient ID

|                      |                      |   |                      |                      |   |                      |                      |                      |                      |
|----------------------|----------------------|---|----------------------|----------------------|---|----------------------|----------------------|----------------------|----------------------|
| <input type="text"/> | <input type="text"/> | / | <input type="text"/> | <input type="text"/> | / | <input type="text"/> | <input type="text"/> | <input type="text"/> | <input type="text"/> |
|----------------------|----------------------|---|----------------------|----------------------|---|----------------------|----------------------|----------------------|----------------------|

Date of Birth (Month/Date/Year)

### 5.3 Pancreatic or Biliary imaging and intervention (to be filled at discharge)

(Data to be retrieved by the research team through interview and EMR)

**5.3.1** Has the patient ever had any of the following endoscopic or surgical interventions during this admission?

(If Yes, please verify the indication(s) of endoscopic or surgical interventions)

| Procedure                         | Yes | No | Age | # of times | Indication |
|-----------------------------------|-----|----|-----|------------|------------|
| Endoscopic necrosectomy           |     |    |     |            |            |
| Endoscopic drainage of collection |     |    |     |            |            |

### 5.4 Family History

Did any of the following diseases occur in first-degree family members (parents, siblings, or children)?

|                                   | Yes | No | Unknown |
|-----------------------------------|-----|----|---------|
| Acute pancreatitis                |     |    |         |
| Chronic pancreatitis              |     |    |         |
| Pancreatic cancer                 |     |    |         |
| Diabetes                          |     |    |         |
| Celiac disease                    |     |    |         |
| High triglycerides                |     |    |         |
| Cystic fibrosis                   |     |    |         |
| Exocrine Pancreatic insufficiency |     |    |         |

## 6. Drug History

All data should be collected based on patients' history BEFORE AP-related abdominal pain onset.

### 6.1 NSAIDs\* use

Yes (Taken within last 7 days prior to pain onset)     Yes (Taken within last 30 days prior to pain onset)     No

➤ If yes, how many doses have you had? \_\_\_\_\_

➤ If yes, when did you have your last NSAID dose? \_\_\_\_\_

\* (NSAIDs include: ASA, Advil, Motrin, Aleve, Ascriptin, Cambia, Cataflam, Anaprox, Clinoril, Daypro, Feldene, Indocin, Tivorbex, Naprelan, Naprosyn, Voltaren, Zorvolex, Vimovo)

**6.2** Statin use     Yes     No



|                      |                      |                      |   |                      |                      |                      |                      |
|----------------------|----------------------|----------------------|---|----------------------|----------------------|----------------------|----------------------|
| <input type="text"/> | <input type="text"/> | <input type="text"/> | - | <input type="text"/> | <input type="text"/> | <input type="text"/> | <input type="text"/> |
|----------------------|----------------------|----------------------|---|----------------------|----------------------|----------------------|----------------------|

Initials

Patient ID

|                      |                      |   |                      |                      |   |                      |                      |                      |                      |
|----------------------|----------------------|---|----------------------|----------------------|---|----------------------|----------------------|----------------------|----------------------|
| <input type="text"/> | <input type="text"/> | / | <input type="text"/> | <input type="text"/> | / | <input type="text"/> | <input type="text"/> | <input type="text"/> | <input type="text"/> |
|----------------------|----------------------|---|----------------------|----------------------|---|----------------------|----------------------|----------------------|----------------------|

Date of Birth (Month/Date/Year)

➤ If yes, when did you start it? \_\_\_\_\_

### 6.3 Detailed list of Drug history (Before the onset of acute pancreatitis attack)

Please write down the names of medications which were started within the last two months prior to pain onset.

| Medication (Circle the medication(s) within each group when indicated)                                                                    | Yes                |                    |                    |            |           | No | Uncertain |
|-------------------------------------------------------------------------------------------------------------------------------------------|--------------------|--------------------|--------------------|------------|-----------|----|-----------|
|                                                                                                                                           | Started W/I 7 days | Taking W/I 30 days | Taking W/I 60 days | Daily Dose | As needed |    |           |
| Pancreatic enzyme replacement therapy (e.g. Creon, Zenpep, Zymase)                                                                        |                    |                    |                    |            |           |    |           |
| Narcotics (morphine, Dilaudid, oxycodone, oxymorphone, codeine, tramadol, other)                                                          |                    |                    |                    |            |           |    |           |
| Proton pump inhibitors (omeprazole, pantoprazole, esomeprazole, other)                                                                    |                    |                    |                    |            |           |    |           |
| Antibiotics (ciprofloxacin, metronidazole, tetracycline, isoniazide, dapsone, sulfonamides, erythromycin, pentamidine, isoniazide, other) |                    |                    |                    |            |           |    |           |
| Steroids (oral or intravenous)                                                                                                            |                    |                    |                    |            |           |    |           |
| Immunomodulators (6-mercaptopurine, azathioprine)                                                                                         |                    |                    |                    |            |           |    |           |
| HIV therapy (Lamivudine, didanoside, nelfinavir, other)                                                                                   |                    |                    |                    |            |           |    |           |
| Hormonal therapy (estrogens, carbimazole, tamoxifen, testosterone)                                                                        |                    |                    |                    |            |           |    |           |
| Cannabis (medical)                                                                                                                        |                    |                    |                    |            |           |    |           |
| Olanzapine                                                                                                                                |                    |                    |                    |            |           |    |           |

### 6.4 Vitamin/Minerals Supplements (Before the onset of acute pancreatitis attack)

| Supplement  | Yes | No | If yes: Daily Dose | Duration | Uncertain |
|-------------|-----|----|--------------------|----------|-----------|
| Vitamin B12 |     |    |                    |          |           |
| Vitamin K   |     |    |                    |          |           |
| Vitamin A   |     |    |                    |          |           |
| Vitamin E   |     |    |                    |          |           |

|                      |  |  |  |  |  |
|----------------------|--|--|--|--|--|
| Vitamin D            |  |  |  |  |  |
| Multivitamin/mineral |  |  |  |  |  |
| Iron                 |  |  |  |  |  |
| Folate               |  |  |  |  |  |
| Phosphorus           |  |  |  |  |  |
| Magnesium            |  |  |  |  |  |

6.5 If the subject is on Multivitamin, please provide the generic name of multivitamin/mineral:

---



---

## 7. Social History

### 7.1 Alcohol

7.1.1 Have you drank more than 20 drinks, including beer, wine, wine coolers, liquor, or mixed drinks, in your life?  Yes  No, *go to section 8.2*

7.1.2 How old were you when you first started drinking, not counting small tastes or sips of alcohol? \_\_\_\_\_ years

7.1.3 Do you currently drink alcohol?  Yes  No

7.1.4 If no, how old were you when you stopped drinking alcohol? \_\_\_\_\_ years

### **\*ALL SUBJECTS\***

Questions 8.1.5-8.1.10 ask about your alcohol consumption during the period of maximum (most) drinking in your lifetime (this could be consecutive or non-consecutive periods of time).

*(NOTE: It is possible that this period could be "SIMILAR TO" or "OVERLAP WITH" the "YEARS BEFORE GETTING PANCREAS PROBLEM/PANCREATITIS". Even in that case, please complete this section.)*

|              |                                                                                                                             |                                                                         |
|--------------|-----------------------------------------------------------------------------------------------------------------------------|-------------------------------------------------------------------------|
| <b>7.1.5</b> | How old were you when you began drinking the most (heaviest amount) alcohol in your life?                                   | _____ years                                                             |
| <b>7.1.6</b> | How long did you drink alcohol at the heaviest level?                                                                       | __ years __ months<br><input type="checkbox"/> Still drinking that much |
| <b>7.1.7</b> | On the <b>AVERAGE</b> how many drinks would you have on a drinking day <u>during the period of maximum (most) drinking?</u> | _____ drinks/day                                                        |
| <b>7.1.8</b> | How many days a month did you drink at this level?                                                                          | _____ days/month                                                        |

|               |                                                                         |                  |
|---------------|-------------------------------------------------------------------------|------------------|
|               |                                                                         |                  |
| <b>7.1.9</b>  | What is the <b>MOST</b> number of drinks you would have in any one day? | _____ drinks/day |
| <b>7.1.10</b> | How many days a month did you drink at this level?                      | _____ days/month |

**7.1.11** How would you describe the pattern of drinking in the six months before getting pancreatitis?

- |                                                               |                                                                 |
|---------------------------------------------------------------|-----------------------------------------------------------------|
| <input type="checkbox"/> Frequent (15 days or more per month) | <input type="checkbox"/> Binge (at least 3 days heavy drinking) |
| <input type="checkbox"/> Occasional (less than 15 days)       | <input type="checkbox"/> Special Occasions                      |
| <input type="checkbox"/> Weekend mainly                       | <input type="checkbox"/> Abstinent                              |
| <input type="checkbox"/> Not sure                             |                                                                 |

**7.1.12** How many hours or days did you have your last drink before the onset of pain?

(If you don't remember the exact time please provide an approximation)

- |                                             |                                      |                                           |
|---------------------------------------------|--------------------------------------|-------------------------------------------|
| <input type="checkbox"/> Less than 12 hours | <input type="checkbox"/> 48-72 hours | <input type="checkbox"/> More than 7 days |
| <input type="checkbox"/> 12-24 hours        | <input type="checkbox"/> 3-7 days    |                                           |
| <input type="checkbox"/> 24-48 hours        |                                      |                                           |
| <input type="checkbox"/> Not sure           |                                      |                                           |

## 7.2 Smoking

**7.2.1** Have you smoked 100 cigarettes or more in your life?  Yes, *continue*  No, *go to question 7.3*

|              |                                                                                                                                      |                                                          |
|--------------|--------------------------------------------------------------------------------------------------------------------------------------|----------------------------------------------------------|
| <b>7.2.2</b> | What age did you start smoking cigarettes?                                                                                           | _____ years                                              |
| <b>7.2.3</b> | Do you currently smoke cigarettes?                                                                                                   | <input type="checkbox"/> Yes <input type="checkbox"/> No |
| <b>7.2.4</b> | <u>If former smoker</u> , at what age did you quit smoking cigarettes?                                                               | _____ years                                              |
| <b>7.2.5</b> | On average, how many cigarettes do /did you smoke per day? (if less than 1 per day on average, enter '1')                            | _____ cigarettes/day                                     |
| <b>7.2.6</b> | How many total years have you smoked cigarettes on a regular basis? (Please do not include years when you quit for 6 or more months) | _____ years _____ months                                 |

-    

Initials

Patient ID

  /   /    

Date of Birth (Month/Date/Year)

## 8. Exocrine Pancreatic Insufficiency (EPI) GI Symptom Tracker

These questions are about your current symptoms, as you perceive them. If you are not sure of how to answer, choose the response that seems closest to your situation. After answering the questions below:

### 8.1 During the past two weeks, how often have you:

|                                                                                                                                                                  | Almost Always | Often | Sometimes | Never |
|------------------------------------------------------------------------------------------------------------------------------------------------------------------|---------------|-------|-----------|-------|
| 8.1.1 Had frequent diarrhea?                                                                                                                                     |               |       |           |       |
| 8.1.2 Had greasy/oily stools? (indicated by oil droplets which float in the toilet water, stools that may have white or yellow fat in them or stools that float) |               |       |           |       |
| 8.1.3 Had difficult to flush stool?                                                                                                                              |               |       |           |       |
| 8.1.4 Had foul-smelling stool?                                                                                                                                   |               |       |           |       |
| 8.1.5 Had loose stools?                                                                                                                                          |               |       |           |       |
| 8.1.6 Felt bloated?                                                                                                                                              |               |       |           |       |
| 8.1.7 Had excessive gas?                                                                                                                                         |               |       |           |       |
| 8.1.8 Had abdominal pain?                                                                                                                                        |               |       |           |       |
| 8.1.9 Had to rush to the bathroom in the middle of the night?                                                                                                    |               |       |           |       |
| 8.1.10 Been bothered/concerned by eating fatty or greasy foods?                                                                                                  |               |       |           |       |
| 8.1.11 Been bothered/concerned by using a public bathroom?                                                                                                       |               |       |           |       |
| 8.1.12 Been bothered/concerned by having to stay on the toilet for a long time?                                                                                  |               |       |           |       |
| 8.1.13 Been bothered/concerned by skip a meal?                                                                                                                   |               |       |           |       |
| 8.1.14 Been bothered/concerned by have a poor appetite because of GI problems?                                                                                   |               |       |           |       |
| 8.1.15 Been bothered/concerned by miss daily activities due to GI-related problems?                                                                              |               |       |           |       |

➤ **8.1.16** During the past week before admission, how many stools did you have per day?  
 0-1       2-3       4-5       6 or more

➤ **8.1.17** Usually what is the consistency of your bowel movements?  
 Solid     Soft     Liquid

|                      |                      |                      |   |                      |                      |                      |                      |
|----------------------|----------------------|----------------------|---|----------------------|----------------------|----------------------|----------------------|
| <input type="text"/> | <input type="text"/> | <input type="text"/> | - | <input type="text"/> | <input type="text"/> | <input type="text"/> | <input type="text"/> |
|----------------------|----------------------|----------------------|---|----------------------|----------------------|----------------------|----------------------|

Initials

Patient ID

|                      |                      |   |                      |                      |   |                      |                      |                      |                      |
|----------------------|----------------------|---|----------------------|----------------------|---|----------------------|----------------------|----------------------|----------------------|
| <input type="text"/> | <input type="text"/> | / | <input type="text"/> | <input type="text"/> | / | <input type="text"/> | <input type="text"/> | <input type="text"/> | <input type="text"/> |
|----------------------|----------------------|---|----------------------|----------------------|---|----------------------|----------------------|----------------------|----------------------|

Date of Birth (Month/Date/Year)

## 9. Exercise

### Godin Leisure-Time Exercise Questionnaire

9.1 During a typical 7-Day period, how many times on the average do you do the following kinds of exercise for more than 15 minutes during your free time (write on each line the appropriate number).

|                                                                                                                                                                                                                            | Times Per Week |
|----------------------------------------------------------------------------------------------------------------------------------------------------------------------------------------------------------------------------|----------------|
| a) <b>STRENUOUS EXERCISE</b> (HEART BEATS RAPIDLY) (e.g., running, jogging, hockey, football, soccer, squash, basketball, cross country skiing, judo, roller skating, vigorous swimming, vigorous long distance bicycling) |                |
| b) <b>MODERATE EXERCISE</b> (NOT EXHAUSTING) (e.g., fast walking, baseball, tennis, easy bicycling, volleyball, badminton, easy swimming, alpine skiing, popular and folk dancing)                                         |                |
| c) <b>MILD EXERCISE</b> (MINIMAL EFFORT) (e.g., yoga, archery, fishing from river bank, bowling, horseshoes, golf, snow-mobiling, easy walking)                                                                            |                |

9.2 During a typical 7-Day period (a week), in your leisure time, how often do you engage in any regular activity long enough to work up a sweat (heart beats rapidly)?

Often       Sometimes       Rarely       Never

## 10. Dietary Habits

10.1. In general, how healthy would you rate your overall diet?

Very healthy       Fairly Healthy  
 Healthy       Poor

10.2 Which of the following best describes your typical diet?

Omnivore (no specific restriction with regard to meat protein or vegetable choice)       Strict vegan (only vegetable products)- no eggs, milk, or animal related products  
 Vegetarian (vegetables and some animal products such as eggs and milk)       Pescatarian (eats fish, but no other animal products)  
 Other

10.3 Do you consider your diet to be?

Low fat       About average in fat  
 High in fat       I don't pay attention to fat content

10.4 In the past 30 days, how often did you:

|                                                                                                                       | Very often | Often | Not Often | Not a consumer |
|-----------------------------------------------------------------------------------------------------------------------|------------|-------|-----------|----------------|
| Take probiotics, prebiotics, or food supplements?                                                                     |            |       |           |                |
| Eat or drink items that frequently/may contain probiotic including (eg. yogurt, kefir, sauerkraut, kimchi, kombucha)? |            |       |           |                |
| Eat red meat such as beef, pork, ham, or sausage? Do not include chicken, turkey or seafood?                          |            |       |           |                |
| Eat processed meat, such as bacon, lunchmeats, or hot dogs?                                                           |            |       |           |                |
| Eaten starch (bread, pasta, etc.)?                                                                                    |            |       |           |                |

-

Initials

Patient ID

/   /

Date of Birth (Month/Date/Year)

|                                                                                                                                                       |  |  |  |  |
|-------------------------------------------------------------------------------------------------------------------------------------------------------|--|--|--|--|
| Drink regular soda or pop that contains sugar?                                                                                                        |  |  |  |  |
| Drink coffee or tea?                                                                                                                                  |  |  |  |  |
| Drink sweetened fruit drinks, sports or energy drinks, such as G/Q/6, Kool-Aid, lemonade, Hi-C, cranberry drink, Gatorade, Red Bull or Vitamin Water? |  |  |  |  |
| Consume dairy products such as milk, cheese, and yogurt?                                                                                              |  |  |  |  |
| Eat meals prepared away from home in places such as restaurants, fast food places, food stands, grocery stores, or from vending machines?             |  |  |  |  |
| Eat chocolate or any other types of candy?                                                                                                            |  |  |  |  |
| Eat fruit and drink natural fruit juice?                                                                                                              |  |  |  |  |

**10.16** How many servings of fruits or vegetables do you eat per day?

- 5 or more     3 or 4     1 or 2     I rarely eat fruit and vegetables

**10.17** In the past 30 days have you restricted or removed foods from your diet with lactose or other carbohydrates for malabsorption, bloating or diarrhea?

- Yes     Not a consumer  
 No

**10.18** About how much water would you estimate that you drink per day (a medium sized glass of fluid is about 8 ounces)? \_\_\_\_\_ glasses = \_\_\_\_\_ ounces

**10.19** About how much fluid in the form of juice would you estimate that you drink per day (a medium sized glass of fluid is about 8 ounces)? \_\_\_\_\_ glasses = \_\_\_\_\_ ounces

**10.20** About how much coffee or tea would you estimate that you drink per day (a medium sized glass of fluid is about 8 ounces)? \_\_\_\_\_ glasses = \_\_\_\_\_ ounces

**10.21** About how much fluid in the form of water, juice, coffee, tea, or milk would you estimate that you drink per day (a medium sized glass of fluid is about 8 ounces)? \_\_\_\_\_ glasses = \_\_\_\_\_ ounces

## 11. Quality of Life Questionnaire (SF-12)

This survey asks for your views about your health during the last 4 weeks before your abdominal pain from pancreatitis started. This information will help you keep track of how you feel and how you are able to do your usual activities. Answer every question by selecting the answer as indicated. If you are unsure about how to answer a question, please give the best answer you can

The following questions are about activities you might do during a typical day. Does your health now limit you in these activities and if so, how much?

|                                                                                                                       | Yes, limited a lot | Yes, limited a little | Not limited at all |
|-----------------------------------------------------------------------------------------------------------------------|--------------------|-----------------------|--------------------|
| <b>11.1.1</b> <u>Moderate activities</u> , such as moving a table, pushing a vacuum cleaner, bowling, or playing golf |                    |                       |                    |

|                      |                      |                      |   |                      |                      |                      |                      |
|----------------------|----------------------|----------------------|---|----------------------|----------------------|----------------------|----------------------|
| <input type="text"/> | <input type="text"/> | <input type="text"/> | - | <input type="text"/> | <input type="text"/> | <input type="text"/> | <input type="text"/> |
|----------------------|----------------------|----------------------|---|----------------------|----------------------|----------------------|----------------------|

Initials

Patient ID

|                      |                      |   |                      |                      |   |                      |                      |                      |                      |
|----------------------|----------------------|---|----------------------|----------------------|---|----------------------|----------------------|----------------------|----------------------|
| <input type="text"/> | <input type="text"/> | / | <input type="text"/> | <input type="text"/> | / | <input type="text"/> | <input type="text"/> | <input type="text"/> | <input type="text"/> |
|----------------------|----------------------|---|----------------------|----------------------|---|----------------------|----------------------|----------------------|----------------------|

Date of Birth (Month/Date/Year)

**11.1.2** Climbing several flights of stairs

During the past 4 weeks, have you had any of the following problems with your work or other regular daily activities as a result of your physical health?

|                                                                           | All of the time | Most of the time | Some of the time | A little of the time | None of the time |
|---------------------------------------------------------------------------|-----------------|------------------|------------------|----------------------|------------------|
| <b>11.1.3</b> <u>Accomplished less</u> than you would like                |                 |                  |                  |                      |                  |
| <b>11.1.4</b> Were limited in the <u>kind</u> of work or other activities |                 |                  |                  |                      |                  |

During the past 4 weeks, how much of the time you had any of the following problems with your work or other regular daily activities as a result of any emotional problems (such as feeling depressed or anxious)?

|                                                                             | All of the time | Most of the time | Some of the time | A little of the time | None of the time |
|-----------------------------------------------------------------------------|-----------------|------------------|------------------|----------------------|------------------|
| <b>11.1.5</b> <u>Accomplished less</u> than you would like                  |                 |                  |                  |                      |                  |
| <b>11.1.6</b> Did work or other activities <u>less carefully than usual</u> |                 |                  |                  |                      |                  |

**11.1.7** During the past 4 weeks, how much did pain interfere with your normal work (including both work outside the home and housework)?

- Not at all                       Moderately                       Extremely  
 A little bit                       Quite a bit

These questions are about how you feel and how things have been with you during the past 4 weeks. For each question, please give the one answer that comes closest to the way you have been feeling. How much of the time during the past 4 weeks.

|                                                    | All of the time | Most of the time | Some of the time | A little of the time | None of the time |
|----------------------------------------------------|-----------------|------------------|------------------|----------------------|------------------|
| <b>11.1.8</b> Have you felt calm and peaceful?     |                 |                  |                  |                      |                  |
| <b>11.1.9</b> Did you have a lot of energy?        |                 |                  |                  |                      |                  |
| <b>11.1.10</b> Have you felt downhearted and blue? |                 |                  |                  |                      |                  |

**11.1.11** During the past 4 weeks, how much of the time has your physical health or emotional problems interfered with your social activities (like visiting friends, relatives, etc.)

- All of the time                       Some of the time                       None of the time  
 Most of the time                       A little of the time

**11.2 Depression**

**Over the last two weeks, how often have you been bothered by any of the following problems?**

|                                                    | Not at All | Several Days | More Than Half the Days | Nearly Every Day |
|----------------------------------------------------|------------|--------------|-------------------------|------------------|
| 11.2.1 Little interest or pleasure in doing things |            |              |                         |                  |
| 11.2.2 Feeling down, depressed or hopeless         |            |              |                         |                  |

|                      |                      |                      |   |                      |                      |                      |                      |
|----------------------|----------------------|----------------------|---|----------------------|----------------------|----------------------|----------------------|
| <input type="text"/> | <input type="text"/> | <input type="text"/> | - | <input type="text"/> | <input type="text"/> | <input type="text"/> | <input type="text"/> |
|----------------------|----------------------|----------------------|---|----------------------|----------------------|----------------------|----------------------|

Initials

Patient ID

|                      |                      |   |                      |                      |   |                      |                      |                      |                      |
|----------------------|----------------------|---|----------------------|----------------------|---|----------------------|----------------------|----------------------|----------------------|
| <input type="text"/> | <input type="text"/> | / | <input type="text"/> | <input type="text"/> | / | <input type="text"/> | <input type="text"/> | <input type="text"/> | <input type="text"/> |
|----------------------|----------------------|---|----------------------|----------------------|---|----------------------|----------------------|----------------------|----------------------|

Date of Birth (Month/Date/Year)

|                                                                                                                                                                  |  |  |  |  |
|------------------------------------------------------------------------------------------------------------------------------------------------------------------|--|--|--|--|
| 11.2.3 Trouble falling or staying asleep,<br>Or sleeping too much                                                                                                |  |  |  |  |
| 11.2.4 Feeling tired or having little energy                                                                                                                     |  |  |  |  |
| 11.2.5 Poor appetite or overeating                                                                                                                               |  |  |  |  |
| 11.2.6 Feeling bad about yourself-That you are a<br>failure or have let yourself or your family down                                                             |  |  |  |  |
| 11.2.7 Trouble concentrating on things such as<br>Reading the newspaper or watching<br>television                                                                |  |  |  |  |
| 11.2.8 Moving or speaking so slowly that<br>Other people could have noticed? Or the<br>Opposite-being so fidgety or restless<br>That you have been moving around |  |  |  |  |
| 11.2.9 Thoughts that you would be better off<br>dead or of hurting yourself in some way                                                                          |  |  |  |  |

## 12. Quality of Life Questionnaire (PROMIS Global Health Scale)

10.1 Please respond to each item by marking one box per row.

|                                                                                                                                                                                                                                         | Excellent | Very good | Good | Fair | Poor |
|-----------------------------------------------------------------------------------------------------------------------------------------------------------------------------------------------------------------------------------------|-----------|-----------|------|------|------|
| In general, would you say your health is:                                                                                                                                                                                               |           |           |      |      |      |
| In general, would you say your quality of life is:                                                                                                                                                                                      |           |           |      |      |      |
| In general, how would you rate your physical health?                                                                                                                                                                                    |           |           |      |      |      |
|                                                                                                                                                                                                                                         | Excellent | Very good | Good | Fair | Poor |
| In general, how would you rate your mental health, including your<br>mood and your ability to think?                                                                                                                                    |           |           |      |      |      |
| In general, how would you rate your satisfaction with your social<br>activities and relationships?                                                                                                                                      |           |           |      |      |      |
| In general, please rate how well you carry out your usual social<br>activities and roles. (This includes activities at home, at work and in your<br>community, and responsibilities as a parent, child, spouse, employee, friend, etc.) |           |           |      |      |      |

**12.2** To what extent are you able to carry out your everyday physical activities such as walking, climbing stairs, carrying groceries, or moving a chair?

- |                                     |                                     |
|-------------------------------------|-------------------------------------|
| <input type="checkbox"/> Completely | <input type="checkbox"/> A little   |
| <input type="checkbox"/> Mostly     | <input type="checkbox"/> Not at all |
| <input type="checkbox"/> Moderately |                                     |

**12.3** In the past 7 days, how often have you been bothered by emotional problems such as feeling anxious, depressed or irritable?

- |                                    |                                 |
|------------------------------------|---------------------------------|
| <input type="checkbox"/> Never     | <input type="checkbox"/> Often  |
| <input type="checkbox"/> Rarely    | <input type="checkbox"/> Always |
| <input type="checkbox"/> Sometimes |                                 |

**12.4** How would you rate your fatigue on average?



-

Initials

Patient ID

/   /

Date of Birth (Month/Date/Year)

- None
- Mild
- Moderate

- Severe
- Very severe

**12.5 How would you rate your pain on average?**

**1**   **2**   **3**   **4**   **5**   **6**   **7**   **8**   **9**   **10**

**No pain** **Worst pain imaginable**

**Completed by:**

**Name:** \_\_\_\_\_

**Date:** \_\_\_\_\_

-        
 Initials Patient ID

/   /      
 Date of Birth (Month/Date/Year)

**Date of Enrollment:**   /   /     (Month/Date/Year)  
**Proof ID:**      
**APPRENTICE ID:**      
**PAPPEI ID:**

**1. Contact and Follow-up Information**

- 1.1 Is the follow-up data collected?**  Yes  No  
**1.1.1** If answer to question 1,1, is "NO", indicate the reason:  
 Patient refused follow-up  Patient follow-up completed via phone  
 Patient deceased  
 Date of death:   /   /      
 Cause of death: \_\_\_\_\_  
**1.2** Follow-up time-point:  3Month  12 Month  
**1.3** How was the follow-up data collected?  Outpatient Visit  Inpatient Visit  Phone Interview  
**1.4** Date of follow-up data collection:   /   /

**2. Pancreatitis Recurrence and Complications**

**2.1 Re-admission to hospital**

**2.1.1** Since the last contact have you been re-admitted to the hospital?  Yes  No  
 If yes, how many times: \_\_\_\_\_

|                     | Date | Recurrent Acute Pancreatitis | Other medical impression | Length of hospital Stay |
|---------------------|------|------------------------------|--------------------------|-------------------------|
| First Re-admission  |      |                              |                          |                         |
| Second Re-admission |      |                              |                          |                         |
| Third Re-admission  |      |                              |                          |                         |

**2.1.2** If you had readmissions due to recurrent acute pancreatitis, how many of recurrent acute pancreatitis attacks did you have since the last study contact? \_\_\_\_\_

**2.1.3** Since the last study contact, have you gone to emergency room for pancreatitis-related symptoms including upper abdominal pain, nausea/vomiting, inability to have oral intake, fever due to pancreatic infection, tubal feeding problems, etc.?  Yes  No

**2.1.4** Did you undergo any pancreas imaging since last visit?  Yes  No

-

Initials Patient ID

/   /

Date of Birth (Month/Date/Year)

- **2.1.4.1** Which imaging method was applied during this admission?
  - ERCP
  - MRI
  - EUS
  - Contrast-Enhanced CT
  - Non-Contrast-Enhanced CT
  - RUQ US

If yes, Date of this imaging:   /   /

Where was this imaging performed? \_\_\_\_\_

- **2.1.4.2** Is the imaging report available?  Yes  No
- **2.1.4.3** Are the films available?  Yes  No
- **2.1.4.4** What were the reported findings in radiology?
  - Normal pancreas
  - Pancreatic atrophy
  - Interstitial Edematous Pancreatitis
  - Calcifications/Pancreatic duct stone
  - Pancreatic necrosis
  - Pancreatic fluid collection
  - Peripancreatic necrosis
  - Irregularities of the main pancreatic duct and its side branches

- **2.1.9** Extent of pancreatic necrosis (if present)?  <30%  30-50%  >50%

**2.1.5** Were you admitted in ICU setting?  Yes  No  
 If yes, how long did you stay in ICU? \_\_\_\_\_ (days)

**2.2 Emergency Room visits (without admission)**

**2.2.1** Since the last study contact have you had any emergency room visits for that did not result in admission:  Yes  No

If yes, how many times have you visited the emergency room: \_\_\_\_\_

Please give dates and reason:

|             | Date of ER visit | Chief Complaint |
|-------------|------------------|-----------------|
| ER visit #1 |                  |                 |
| ER visit #2 |                  |                 |
| ER visit #3 |                  |                 |

**2.2.2** Were any of the ER visits due to pancreatitis-related symptoms including upper abdominal pain, nausea/vomiting, inability to have oral intake, fever due to pancreatic infection, tubal feeding problems?  Yes  No

**2.3 NJ Tube (for three-month follow-up only)**

**2.3.1** Were you discharged from hospital with NJ tube?  Yes  No  
 If answer to question 2.3.1 is "YES", answer questions 2.3.2 to 2.3.4.

**2.3.2** When was the NJ tube removed?   /   /

**2.3.3** For how long did you have the NJ tube? \_\_\_\_\_

|                      |                      |                      |   |                      |                      |                      |                      |
|----------------------|----------------------|----------------------|---|----------------------|----------------------|----------------------|----------------------|
| <input type="text"/> | <input type="text"/> | <input type="text"/> | - | <input type="text"/> | <input type="text"/> | <input type="text"/> | <input type="text"/> |
|----------------------|----------------------|----------------------|---|----------------------|----------------------|----------------------|----------------------|

Initials

Patient ID

|                      |                      |   |                      |                      |   |                      |                      |                      |                      |
|----------------------|----------------------|---|----------------------|----------------------|---|----------------------|----------------------|----------------------|----------------------|
| <input type="text"/> | <input type="text"/> | / | <input type="text"/> | <input type="text"/> | / | <input type="text"/> | <input type="text"/> | <input type="text"/> | <input type="text"/> |
|----------------------|----------------------|---|----------------------|----------------------|---|----------------------|----------------------|----------------------|----------------------|

Date of Birth (Month/Date/Year)

- 2.3.4** Were there any complications due to the NJ tube?  Yes  No  
 If yes, please specify: \_\_\_\_\_

## 2.4 Diabetes

- 2.4.1** Do you have Diabetes?  Yes  No  Not Sure
- 2.4.2** When were you diagnosed?  
 >10 years ago  1-10 years ago  Within last 12 months
- 2.4.3** Was it diagnosed before/during or after your first pancreatitis attack?  
 Before  During  After
- 2.4.4** When was your diabetes diagnosed?  
 Before I was enrolled to PAPPEI study  
 After enrollment to PAPPEI, during follow up period
- 2.4.5** How is it being treated?  
 Diet only  Insulin  Pills  Uncontrolled

## 2.5 Pancreatic Exocrine Insufficiency (EPI)

- 2.5.1** Since the last study contact, were you diagnosed with pancreatic insufficiency (diarrhea for which your doctor might have prescribed a pancreatic enzyme supplements, such as Creon)?  Yes  No  Not sure

If EPI is diagnosed:

- **2.5.1.1** What was the date of diagnosis /
- **2.5.1.2** How was the exocrine insufficiency documented by (check all that applies):  
 Clinical signs (Steatorrhea)  Quantitative: 24 hour stool fat excretion  
 Fecal Elastase (<200 mcg/gm stool)  Unknown

- 2.5.2** Are you currently taking pancreatic enzymes supplements (i.e. Creon)?  Yes  No

If on pancreatic enzymes answer questions 2.5.2.1 to 2.5.2.5:

- **2.5.2.1** How many enzymes does your healthcare provider tell you to take with:  
 Every meal \_\_\_\_\_ Every snack \_\_\_\_\_
- **2.5.2.2** When are you taking your enzymes?  
 Before meal  During meal  After meal
- **2.5.2.3** What dose of pancreatic enzyme did your health care provider tell you to take with every meal?

- 6000 IU       12000 IU       18000 IU       24000 IU  
 36000 IU       48000 IU       72000 IU

➤ **2.5.2.4** Complete the table below regarding administration of enzymes:

During the past two weeks, how often did you:

|                                                                           | Almost Always | Often | Sometimes | Never |
|---------------------------------------------------------------------------|---------------|-------|-----------|-------|
| Feel bothered by taking enzymes in front of others?                       |               |       |           |       |
| have GI problems (stomachache, loose stools, etc.) due to missed enzymes? |               |       |           |       |
| Forget to bring your enzymes when eating out?                             |               |       |           |       |
| Forget to take your enzymes?                                              |               |       |           |       |

### 2.5.3 Exocrine Pancreatic Insufficiency (EPI) GI Symptom Tracker

The questions 2.5.3.1 to 2.5.3.3 are about your current symptoms, as you perceive them. If you are not sure of how to answer, choose the response that seems closest to your situation.

**2.5.3.1** During the past two weeks, how often have you:

|                                                                                                                                                               | Almost Always | Often | Sometimes | Never |
|---------------------------------------------------------------------------------------------------------------------------------------------------------------|---------------|-------|-----------|-------|
| 1. Had frequent diarrhea?                                                                                                                                     |               |       |           |       |
| 2. Had greasy/oily stools? (indicated by oil droplets which float in the toilet water, stools that may have white or yellow fat in them or stools that float) |               |       |           |       |
| 3. Had difficult to flush stool?                                                                                                                              |               |       |           |       |
| 4. Had foul-smelling stool?                                                                                                                                   |               |       |           |       |
| 5. Had loose stools?                                                                                                                                          |               |       |           |       |
| 6. Felt bloated?                                                                                                                                              |               |       |           |       |
| 7.. Had excessive gas?                                                                                                                                        |               |       |           |       |
| 8. Had abdominal pain?                                                                                                                                        |               |       |           |       |
| 9.. Had to rush to the bathroom in the middle of the night?                                                                                                   |               |       |           |       |
| 10. Been bothered/concerned by eating fatty or greasy foods?                                                                                                  |               |       |           |       |
| 11. Been bothered/concerned by using a public bathroom?                                                                                                       |               |       |           |       |



|                                                                                                            |                                                                                     |                                                                                                                               |                                                                                                                                                                             |
|------------------------------------------------------------------------------------------------------------|-------------------------------------------------------------------------------------|-------------------------------------------------------------------------------------------------------------------------------|-----------------------------------------------------------------------------------------------------------------------------------------------------------------------------|
| <input type="text"/> <input type="text"/> - <input type="text"/> <input type="text"/> <input type="text"/> | <input type="text"/> <input type="text"/> <input type="text"/> <input type="text"/> | <input type="text"/> <input type="text"/> <input type="text"/> <input type="text"/> <input type="text"/> <input type="text"/> | <input type="text"/> <input type="text"/> / <input type="text"/> <input type="text"/> / <input type="text"/> <input type="text"/> <input type="text"/> <input type="text"/> |
| Center                                                                                                     | Initials                                                                            | Patient ID                                                                                                                    | Date of Birth (Month/Date/Year)                                                                                                                                             |

Please verify the date of diagnosis:   /   /

None of the above

Uncertain

### 3. Diet and Lifestyle

- 3.1 What is the patient’s current weight? \_\_\_\_\_ lbs
- 3.2 What was patient’s average weight (1 year ago)? \_\_\_\_\_ lbs
- 3.3 Unintentional weight loss in the past 6 months: \_\_\_\_\_ lbs
- 3.4 Midarm muscle diameter: \_\_\_\_\_ (inches)
- 3.5 What is the current waist size: \_\_\_\_\_ (inches)
- 3.6 Waist to hip ratio: \_\_\_\_\_

### 3.7 Alcohol

*NOTE: In the U.S., a single drink serving contains about 12 grams of ethanol or “pure” alcohol. Although the drinks below are different sizes, each one contains the same amount of pure alcohol and counts as a single drink.*

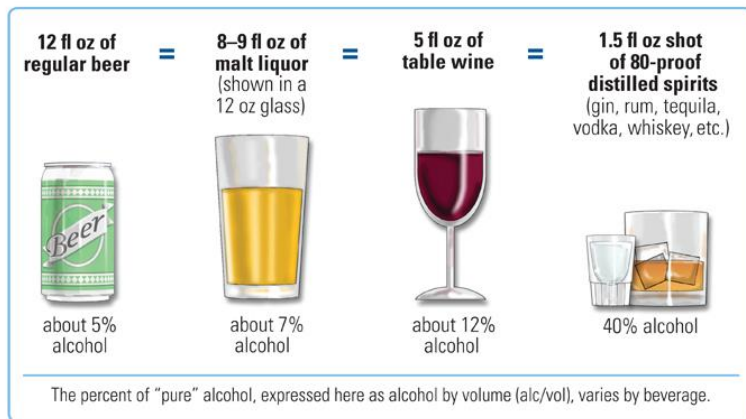

- 3.7.1 Have you ever consumed more than 10 alcoholic drinks in your lifetime?  Yes  No
- 3.7.2 If Yes, do you currently drink alcohol?  Yes  No
- 3.7.3 If No, when did you quit?   /

-

Initials Patient ID

/   /

Date of Birth (Month/Date/Year)

3.7.4 If you currently drink alcohol, on a drinking day, how many drinks do you consume? \_\_\_\_\_

3.7.5 If you currently drink, how many days per week do you drink? \_\_\_\_\_ out of 7

3.7.6 Since our last contact has your alcohol intake?

- Increased  Decreased
- Stayed about the same  Stopped

### 3.8 Smoking

3.8.1 Have you ever smoked more than 100 cigarettes in your lifetime?  Yes  No

3.8.2 If "YES", do you currently smoke?  Yes  No

3.8.3 If "NO", when did you quit?   /

3.8.4 If you currently smoke, how many cigarettes do you smoke per day? \_\_\_\_\_

3.8.5 Since our last contact has your smoking habit?

- Increased  Stayed about the same
- Decreased  Stopped

### 3.9 Drug History

All data should be collected based on patients' history BEFORE AP-related abdominal pain onset.

3.9.1 NSAIDs\* use

- Yes (Taken within last 7 days prior to pain onset)  Yes (Taken within last 30 days prior to pain onset)  No
- If yes, how many doses have you had? \_\_\_\_\_
- If yes, when did you have your last NSAID dose? \_\_\_\_\_

\* (NSAIDs include: ASA, Advil, Motrin, Aleve, Ascriptin, Cambia, Cataflam, Anaprox, Clinoril, Daypro, Feldene, Indocin, Tivorbex, Naprelan, Naprosyn, Voltaren, Zorvolex, Vimovo)

3.9.2 Statin use  Yes  No

- If yes, when did you start it? \_\_\_\_\_

3.9.3 Detailed list of Drug history (Before the onset of acute pancreatitis attack)

Please write down the names of medications which were started within the last two months prior to pain onset.



|                                                                                                                                                                                                  |                                                                                                                                                                             |
|--------------------------------------------------------------------------------------------------------------------------------------------------------------------------------------------------|-----------------------------------------------------------------------------------------------------------------------------------------------------------------------------|
| <input type="text"/> <input type="text"/> - <input type="text"/> <input type="text"/> <input type="text"/> - <input type="text"/> <input type="text"/> <input type="text"/> <input type="text"/> | <input type="text"/> <input type="text"/> / <input type="text"/> <input type="text"/> / <input type="text"/> <input type="text"/> <input type="text"/> <input type="text"/> |
| Center                      Initials                      Patient ID                                                                                                                             | Date of Birth (Month/Date/Year)                                                                                                                                             |

| Medication (Circle the medication(s) within each group when indicated)                                                                    | Started W/I 7 days | Taking W/I 30 days | Taking W/I 60 days | Daily Dose | As needed | No | Not sure |
|-------------------------------------------------------------------------------------------------------------------------------------------|--------------------|--------------------|--------------------|------------|-----------|----|----------|
| Narcotics (morphine, Dilaudid, oxycodone, oxymorphone, codeine, tramadol, other)                                                          |                    |                    |                    |            |           |    |          |
| Proton pump inhibitors (omeprazole, pantoprazole, esomeprazole, other)                                                                    |                    |                    |                    |            |           |    |          |
| Antibiotics (ciprofloxacin, metronidazole, tetracycline, isoniazide, dapsone, sulfonamides, erythromycin, pentamidine, isoniazide, other) |                    |                    |                    |            |           |    |          |
| Steroids (oral or intravenous)                                                                                                            |                    |                    |                    |            |           |    |          |
| Immunomodulators (6-mercaptopurine, azathioprine)                                                                                         |                    |                    |                    |            |           |    |          |
| HIV therapy (Lamivudine, didanoside, nelfinavir, other)                                                                                   |                    |                    |                    |            |           |    |          |
| Hormonal therapy (estrogens, carbimazole, tamoxifen, testosterone)                                                                        |                    |                    |                    |            |           |    |          |
| Chemotherapy (Cytarabine, ifosfamide, all-transretinoic acid, L-asparaginase, capecitabine, other)                                        |                    |                    |                    |            |           |    |          |
| Cannabis (medical)                                                                                                                        |                    |                    |                    |            |           |    |          |
| Olanzapine (Zofran)                                                                                                                       |                    |                    |                    |            |           |    |          |

**3.9.4 Vitamin/Minerals Supplements (Before the onset of acute pancreatitis attack)**

| Supplement           | Yes | No | If yes: Daily Dose | Duration | Not sure |
|----------------------|-----|----|--------------------|----------|----------|
| Vitamin B12          |     |    |                    |          |          |
| Vitamin K            |     |    |                    |          |          |
| Vitamin A            |     |    |                    |          |          |
| Vitamin E            |     |    |                    |          |          |
| Vitamin D            |     |    |                    |          |          |
| Multivitamin/mineral |     |    |                    |          |          |
| Iron                 |     |    |                    |          |          |
| Folate               |     |    |                    |          |          |
| Phosphorus           |     |    |                    |          |          |
| Magnesium            |     |    |                    |          |          |

-

Initials Patient ID

/   /

Date of Birth (Month/Date/Year)

3.9.5 List of Medications which **were started** within the last two months:

---



---

### 3.10 Exercise

#### Godin Leisure-Time Exercise Questionnaire

3.10.1 Do you exercise at all?  Yes  No

If yes, during a typical 7-Day period, how many times on the average do you do the following kinds of exercise for more than 15 minutes during your free time (write on each line the appropriate number).

|                                                                                                                                                                                                                            | Times Per Week |
|----------------------------------------------------------------------------------------------------------------------------------------------------------------------------------------------------------------------------|----------------|
| a) <b>STRENUOUS EXERCISE</b> (HEART BEATS RAPIDLY) (e.g., running, jogging, hockey, football, soccer, squash, basketball, cross country skiing, judo, roller skating, vigorous swimming, vigorous long distance bicycling) |                |
| b) <b>MODERATE EXERCISE</b> (NOT EXHAUSTING) (e.g., fast walking, baseball, tennis, easy bicycling, volleyball, badminton, easy swimming, alpine skiing, popular and folk dancing)                                         |                |
| c) <b>MILD EXERCISE</b> (MINIMAL EFFORT) (e.g., yoga, archery, fishing from river bank, bowling, horseshoes, golf, snow-mobiling, easy walking)                                                                            |                |

3.10.2 During a typical 7-Day period (a week), in your leisure time, how often do you engage in any regular activity long enough to work up a sweat (heart beats rapidly)?

Often  Sometimes  Rarely  Never  Not sure

### 3.11. Dietary Habits

3.11.1 What sort of nutrition did you have when you were discharged from the hospital?

|        |          |            |                                 |
|--------|----------|------------|---------------------------------|
| Center | Initials | Patient ID | Date of Birth (Month/Date/Year) |
|--------|----------|------------|---------------------------------|

- Oral                                       Enteral                                       TPN

**3.11.2** If Enteral or TPN, how long did you stay on this diet after discharge?

- 1 week                                       4 Weeks                                       >6 Weeks  
 2 Weeks                                       5 Weeks  
 3 Weeks                                       6 Weeks

**3.11.1** Since our last contact have there been any changes in your diet (check all that apply)

- Reduced calories                                       Reduced Fat intake  
 Increased Fruit/vegetables                                       Stayed the same

**3.11.2** In general, how healthy would you rate your overall diet?

- Very healthy                                       Fairly Healthy  
 Healthy                                       Poor

**3.11.3** Which of the following best describes your typical diet?

- Omnivore (no specific restriction with regard to meat protein or vegetable choice)                                       Strict vegan (only vegetable products)- no eggs, milk, or animal related products  
 Vegetarian (vegetables and some animal products such as eggs and milk)                                       Pescatarian (eats fish, but no other animal products)  
 Other

**3.11.4** Do you consider your diet to be?

- Low fat                                       High in fat  
 About average in fat                                       I don't pay attention to fat content

In the past 30 days, how often:

|                                                                                                                                                                              | Very often<br>(+1×/day) | Often<br>(2-6×/WK) | Not often<br>(-2×/WK) | Not a consumer |
|------------------------------------------------------------------------------------------------------------------------------------------------------------------------------|-------------------------|--------------------|-----------------------|----------------|
| <b>3.11.5</b> Did you take probiotics, prebiotics, or food supplements?                                                                                                      |                         |                    |                       |                |
| <b>3.11.6</b> Eat or drink items that frequently/may contain probiotic (eg. yogurt, kefir, sauerkraut, kimchi, kombucha)?                                                    |                         |                    |                       |                |
| <b>3.11.7</b> Eat red meat such as beef, pork, ham, or sausage? Do not include chicken, turkey or seafood                                                                    |                         |                    |                       |                |
| <b>3.11.8</b> Eat processed meat, such as bacon, lunchmeats, or hot dogs?                                                                                                    |                         |                    |                       |                |
| <b>3.11.9</b> Eaten starch (bread, pasta, etc.)?                                                                                                                             |                         |                    |                       |                |
| <b>3.11.10</b> Did you drink regular soda or pop that contains sugar?                                                                                                        |                         |                    |                       |                |
| <b>3.11.11</b> Did you drink coffee or tea?                                                                                                                                  |                         |                    |                       |                |
| <b>3.11.12</b> Did you drink sweetened fruit drinks, sports or energy drinks, such as G/Q/6, Kool-Aid, lemonade, Hi-C, cranberry drink, Gatorade, Red Bull or Vitamin Water? |                         |                    |                       |                |
| <b>3.11.13</b> Did you consume dairy products such as milk, cheese, and yogurt?                                                                                              |                         |                    |                       |                |



|                      |                      |   |                      |                      |   |                      |                                 |                      |                      |   |                      |   |                      |                      |                      |                      |
|----------------------|----------------------|---|----------------------|----------------------|---|----------------------|---------------------------------|----------------------|----------------------|---|----------------------|---|----------------------|----------------------|----------------------|----------------------|
| <input type="text"/> | <input type="text"/> | - | <input type="text"/> | <input type="text"/> | - | <input type="text"/> | <input type="text"/>            | <input type="text"/> | <input type="text"/> | / | <input type="text"/> | / | <input type="text"/> | <input type="text"/> | <input type="text"/> | <input type="text"/> |
| Center               | Initials             |   | Patient ID           |                      |   |                      | Date of Birth (Month/Date/Year) |                      |                      |   |                      |   |                      |                      |                      |                      |

- |                                            |                                           |                                               |
|--------------------------------------------|-------------------------------------------|-----------------------------------------------|
| <input type="checkbox"/> Less than 6 hours | <input type="checkbox"/> 6-12 hours       | <input type="checkbox"/> 12-24 hours          |
| <input type="checkbox"/> 1-3 days          | <input type="checkbox"/> More than 3 days | <input type="checkbox"/> I have constant pain |

**4.4** During the FOLLOW-UP period, in your opinion, has the abdominal pain problem:

- |                                   |                                                 |                                   |
|-----------------------------------|-------------------------------------------------|-----------------------------------|
| <input type="checkbox"/> Improved | <input type="checkbox"/> Remained the same      | <input type="checkbox"/> Worsened |
| <input type="checkbox"/> Resolved | <input type="checkbox"/> Had no pain previously | <input type="checkbox"/> Not sure |

**4.5** Which pain medication do you take?

Please verify the dose and the frequency you take these medications.

| Pain Medication | Dose (mg/day) | Frequency (How Often) | GI-related (yes/no) | Other reasons of pain |
|-----------------|---------------|-----------------------|---------------------|-----------------------|
|                 |               |                       |                     |                       |
|                 |               |                       |                     |                       |
|                 |               |                       |                     |                       |
|                 |               |                       |                     |                       |
|                 |               |                       |                     |                       |

**4.6** Do you currently work or attend school?  Yes  No

**4.6.1** If answer to question 4.6 is “YES”, how many work days or school days have you missed in the last month due to abdominal pain? \_\_\_\_\_ days/past 30 days

**4.7** Are you on disability or unemployed because of your abdominal pain?

- Yes  No If yes, since when /  (month/year)

**4.8** Are you on disability or unemployed due to reasons other than abdominal issue?

- Yes  No If yes, since when /  (month/year)

|                      |                      |                      |            |                      |                      |                      |                      |
|----------------------|----------------------|----------------------|------------|----------------------|----------------------|----------------------|----------------------|
| <input type="text"/> | <input type="text"/> | <input type="text"/> | -          | <input type="text"/> | <input type="text"/> | <input type="text"/> | <input type="text"/> |
| Initials             |                      |                      | Patient ID |                      |                      |                      |                      |

|                                 |                      |   |                      |                      |   |                      |                      |                      |                      |
|---------------------------------|----------------------|---|----------------------|----------------------|---|----------------------|----------------------|----------------------|----------------------|
| <input type="text"/>            | <input type="text"/> | / | <input type="text"/> | <input type="text"/> | / | <input type="text"/> | <input type="text"/> | <input type="text"/> | <input type="text"/> |
| Date of Birth (Month/Date/Year) |                      |   |                      |                      |   |                      |                      |                      |                      |

## 5. Quality of Life Questionnaire (SF-12)

The following questions are about activities you might do during a typical day. Does your health now limit you in these activities and if so, how much?

|                                                                                                           | Yes, limited a lot | Yes limited a little | Not limited at all |
|-----------------------------------------------------------------------------------------------------------|--------------------|----------------------|--------------------|
| <b>5.1</b> Moderate activities, such as moving a table, pushing a vacuum cleaner, bowling or playing golf |                    |                      |                    |
| <b>5.2</b> Climbing several flights of stairs                                                             |                    |                      |                    |

During the past 4 weeks, have you had any of the following problems with your work or other regular daily activities *as a result of your physical health*?

|                                                                 | All of the time | Most of the time | Some of the time | A little of the time | None of the time |
|-----------------------------------------------------------------|-----------------|------------------|------------------|----------------------|------------------|
| <b>5.3</b> Accomplished less than you would like                |                 |                  |                  |                      |                  |
| <b>5.4</b> Were limited in the kind of work or other activities |                 |                  |                  |                      |                  |

During the past 4 weeks, how much of the time you had any of the following problems with your work or other regular daily activities as a result of any emotional problems (such as feeling depressed or anxious)?

|                                                                   | All of the time | Most of the time | Some of the time | A little of the time | None of the time |
|-------------------------------------------------------------------|-----------------|------------------|------------------|----------------------|------------------|
| <b>5.5</b> Accomplished less than you would like                  |                 |                  |                  |                      |                  |
| <b>5.6</b> Did work or other activities less carefully than usual |                 |                  |                  |                      |                  |

**5.7** During the past 4 weeks, how much did pain interfere with your normal work (including both work outside the home and housework)?

Not at all                       Moderately                       Extremely  
 A little bit                       Quite a bit

These questions are about how you feel and how things have been with you during the past time 4 weeks. For each question, please give the one answer that comes closest to the way you have been feeling. How much of the time during the past 4 weeks.

|       | All of the time | Most of the time | Some of the time | A little of the time | None of the time |
|-------|-----------------|------------------|------------------|----------------------|------------------|
| _____ |                 |                  |                  |                      |                  |

|                                                                                                            |                                                                |                                                                                     |                                                                                                                                                        |
|------------------------------------------------------------------------------------------------------------|----------------------------------------------------------------|-------------------------------------------------------------------------------------|--------------------------------------------------------------------------------------------------------------------------------------------------------|
| <input type="text"/> <input type="text"/> - <input type="text"/> <input type="text"/> <input type="text"/> | <input type="text"/> <input type="text"/> <input type="text"/> | <input type="text"/> <input type="text"/> <input type="text"/> <input type="text"/> | <input type="text"/> <input type="text"/> / <input type="text"/> <input type="text"/> / <input type="text"/> <input type="text"/> <input type="text"/> |
| Center                                                                                                     | Initials                                                       | Patient ID                                                                          | Date of Birth (Month/Date/Year)                                                                                                                        |

|                                         |  |  |  |  |  |
|-----------------------------------------|--|--|--|--|--|
| 5.8 Have you felt calm and peaceful     |  |  |  |  |  |
| 5.9 Did you have a lot of energy?       |  |  |  |  |  |
| 5.10 Have you felt downhearted and blue |  |  |  |  |  |

**5.11** During the past 4 weeks, how much of the time has your physical health or emotional problems interfered with your social activities (like visiting friends, relatives, etc).

- |                                           |                                               |
|-------------------------------------------|-----------------------------------------------|
| <input type="checkbox"/> All of the time  | <input type="checkbox"/> A little of the time |
| <input type="checkbox"/> Most of the time | <input type="checkbox"/> None of the time     |
| <input type="checkbox"/> Some of the time |                                               |

**5.12 Depression**

**Over the last two weeks, how often have you been bothered by any of the following problems?**

|                                                                                                                                                         | Not at All | Several Days | More Than Half the Days | Nearly Every Day |
|---------------------------------------------------------------------------------------------------------------------------------------------------------|------------|--------------|-------------------------|------------------|
| 5.12.1 Little interest or pleasure in doing things                                                                                                      |            |              |                         |                  |
| 5.12.2 Feeling down, depressed or hopeless                                                                                                              |            |              |                         |                  |
| 5.12.3 Trouble falling or staying asleep, Or sleeping too much                                                                                          |            |              |                         |                  |
| 5.12.4 Feeling tired or having little energy                                                                                                            |            |              |                         |                  |
| 5.12.5 Poor appetite or overeating                                                                                                                      |            |              |                         |                  |
| 5.12.6 Feeling bad about yourself-That you are a failure or have let yourself or your family down                                                       |            |              |                         |                  |
| 5.12.7 Trouble concentrating on things such as Reading the newspaper or watching television                                                             |            |              |                         |                  |
| 5.12.8 Moving or speaking so slowly that Other people could have noticed? Or the Opposite-being so fidgety or restless That you have been moving around |            |              |                         |                  |
| 5.12.9 Thoughts that you would be better off dead or of hurting yourself in some way                                                                    |            |              |                         |                  |

**6. PROMIS Global Health Scale**

Please respond to each item by marking one box per row.

|                                                                 | Excellent | Very good | Good | Fair | Poor |
|-----------------------------------------------------------------|-----------|-----------|------|------|------|
| <b>6.1</b> In general, would you say your health is:            |           |           |      |      |      |
| <b>6.2</b> In general, would you say your quality of life is:   |           |           |      |      |      |
| <b>6.3</b> In general, how would you rate your physical health? |           |           |      |      |      |

|                      |                      |                      |   |                      |                      |                      |                      |
|----------------------|----------------------|----------------------|---|----------------------|----------------------|----------------------|----------------------|
| <input type="text"/> | <input type="text"/> | <input type="text"/> | - | <input type="text"/> | <input type="text"/> | <input type="text"/> | <input type="text"/> |
|----------------------|----------------------|----------------------|---|----------------------|----------------------|----------------------|----------------------|

Initials

Patient ID

|                      |                      |   |                      |                      |   |                      |                      |                      |                      |
|----------------------|----------------------|---|----------------------|----------------------|---|----------------------|----------------------|----------------------|----------------------|
| <input type="text"/> | <input type="text"/> | / | <input type="text"/> | <input type="text"/> | / | <input type="text"/> | <input type="text"/> | <input type="text"/> | <input type="text"/> |
|----------------------|----------------------|---|----------------------|----------------------|---|----------------------|----------------------|----------------------|----------------------|

Date of Birth (Month/Date/Year)

|                                                                                                                                                                                                                                              |  |  |  |  |  |
|----------------------------------------------------------------------------------------------------------------------------------------------------------------------------------------------------------------------------------------------|--|--|--|--|--|
| <b>6.4</b> In general, how would you rate your mental health, including your mood and your ability to think?                                                                                                                                 |  |  |  |  |  |
| <b>6.5</b> In general, how would you rate your satisfaction with your social activities and relationships?                                                                                                                                   |  |  |  |  |  |
| <b>6.6</b> In general, please rate how well you carry out your usual social activities and roles. (This includes activities at home, at work and in your community, and responsibilities as a parent, child, spouse, employee, friend, etc.) |  |  |  |  |  |

|                                                                                                                                                                | Completely | Mostly | Moderately | A little | Not at all |
|----------------------------------------------------------------------------------------------------------------------------------------------------------------|------------|--------|------------|----------|------------|
| <b>6.7</b> To what extent are you able to carry out your everyday physical activities such as walking, climbing stairs, carrying groceries, or moving a chair? |            |        |            |          |            |

**In the past 7 days...**

|                                                                                                                    | Never | Rarely | Sometimes | Often | Always |
|--------------------------------------------------------------------------------------------------------------------|-------|--------|-----------|-------|--------|
| <b>6.8</b> How often have you been bothered by emotional problems such as feeling anxious, depressed or irritable? |       |        |           |       |        |

|                                                        | None | Mild | Moderate | Severe | Very Severe |
|--------------------------------------------------------|------|------|----------|--------|-------------|
| <b>6.9</b> How would you rate your fatigue on average? |      |      |          |        |             |

**6.9.1** How would you rate your pain on average?

1            2            3            4            5            6            7            8            9            10

No Pain

Worst imaginable pain

**Completed by:**



|                      |                      |          |                      |                      |                      |   |                      |                      |                                 |                      |                      |                      |                      |                      |                      |                      |                      |                      |                      |
|----------------------|----------------------|----------|----------------------|----------------------|----------------------|---|----------------------|----------------------|---------------------------------|----------------------|----------------------|----------------------|----------------------|----------------------|----------------------|----------------------|----------------------|----------------------|----------------------|
| <input type="text"/> | <input type="text"/> | -        | <input type="text"/> | <input type="text"/> | <input type="text"/> | - | <input type="text"/> | <input type="text"/> | <input type="text"/>            | <input type="text"/> | <input type="text"/> | <input type="text"/> | <input type="text"/> | <input type="text"/> | <input type="text"/> | <input type="text"/> | <input type="text"/> | <input type="text"/> | <input type="text"/> |
| Center               |                      | Initials |                      |                      | Patient ID           |   |                      |                      | Date of Birth (Month/Date/Year) |                      |                      |                      |                      |                      |                      |                      |                      |                      |                      |

**Name:** \_\_\_\_\_ **Date:** \_\_\_\_\_

## PAPPEI Study Lab Procedures

### Sample Protocol for Clinical and Research Blood and Stool Samples

#### Sample Collection Time Points

Samples will be collected at these time points. Please make sure your IRB is reflective of the blood volumes.

|                                       | Baseline | 3 month Follow Up Visit      | 12 month Follow Up Visit                     |
|---------------------------------------|----------|------------------------------|----------------------------------------------|
| <b>Blood Clinical Labs (15 tests)</b> | X        | X                            | X                                            |
| <b>Blood Research</b>                 |          |                              |                                              |
| 2 red non-additives (serum)           | X        | X                            | X                                            |
| 1 lavender EDTA (DNA)                 | X        | X only if missed at baseline | X only if missed at baseline & 3 month visit |
| <b>Stool (clinical and research)</b>  |          |                              |                                              |
| EZ Sampler (for fecal elastase)       | X        | X                            | X                                            |
| Snap container                        | X        | X                            | X                                            |
| DNA/RNA Shield                        | X        | X                            | X                                            |

#### Clinical Labs

| Priority | CHARGE DESCRIPTION                    | Tube Type                        | Volume needed per test (SR/PL) | Results expected                                      | Reference Range Age | Reference Ranges                                                                                  |
|----------|---------------------------------------|----------------------------------|--------------------------------|-------------------------------------------------------|---------------------|---------------------------------------------------------------------------------------------------|
| *VERY*   | Fecal Elastase & 72 hr                |                                  |                                |                                                       |                     |                                                                                                   |
| 1.1      | ALBUMIN PNL                           | 1 light green PST (or gold SST)  |                                | within 4 hours                                        | 15Y                 | 3.4-5.0 g/dL                                                                                      |
| 1.2      | PRE ALBUMIN                           |                                  |                                | within 4 hours                                        | 20Y                 | 18-38 mg/dL                                                                                       |
| 1.3      | VITAMIN B 12 TEST                     |                                  |                                | within 4 hours                                        | ALL                 | 211-911 pg/mL                                                                                     |
| 1.4      | FOLATE SERUM                          |                                  |                                | within 4 hours                                        | ALL                 | >5.0 ng/mL                                                                                        |
| 1.5      | FE                                    |                                  |                                | within 4 hours                                        | Gender              | Male = 45-182 ug/dL ;<br>Female = 28-170                                                          |
| 1.5      | TIBC                                  |                                  |                                | within 4 hours                                        | ALL                 | 250-420 ug/dL                                                                                     |
| 1.5      | Ferritin                              |                                  |                                | within 4 hours                                        | ALL                 | 10 - 282 ng/mL                                                                                    |
| 1.6      | PHOSPHORUS SERUM                      |                                  |                                | within 4 hours                                        | 15Y                 | 2.5-4.6 mg/dL                                                                                     |
| 1.6      | MAGNESIUM                             |                                  |                                | within 4 hours                                        | 15Y                 | 1.6 - 2.3 mg/dL                                                                                   |
| 2        | HEMOGLOBIN GLYCOSYLATED (A1C)         | 1 lavender EDTA                  | full                           | Overnight                                             | All                 | 4.3 - 6.1 %                                                                                       |
| 3        | Retinol Binding Protein               | 1 gold SST serum                 | 250uL                          | run on Tuesdays and Fridays and reports within 4 days | Adult               | 1.5-6.7 mg/dL                                                                                     |
| 4        | Vitamin D (D2, D3, total)             | 1 plain red                      | 500uL                          | Overnight                                             | All                 | 25-100 ng/mL                                                                                      |
| 5.1      | VITAMIN A LEVEL                       |                                  | 500 uL                         | 2x per week                                           | 20Y                 | 30.0-80.0 ug/dL                                                                                   |
| 5.2      | VITAMIN E LEVEL                       | 1 plain red serum (wrap in foil) |                                | 2x per week                                           | 18Y to 45Y          | 45Y = 5.2-7.4 ug/mL ;<br>35Y = 5.1-13.7 ug/mL ;<br>25Y = 5.8-15.1 ug/mL ;<br>18Y = 4.3-19.0 ug/mL |
| 6        | CBC/Diff/Platelet                     | 1 lavender EDTA                  | full                           | within 4 hours                                        |                     |                                                                                                   |
| 7        | PT PROTHROMBIN TIME (Protime and INR) | 1 light blue Na Citrate          | full                           | within 4 hours                                        | 16Y                 | Protime 11.2 - 15.1 sec<br>INR 0.8-1.2 ratio                                                      |

Here is a chart of all clinical lab tests along with priority. All other columns are an example of University of Pittsburgh's clinical workflow.

## Research Blood

### *PAPPEI Labels*

Here is an example of the labels for the serum and DNA (buffy Coat) tubes (see Figure below).

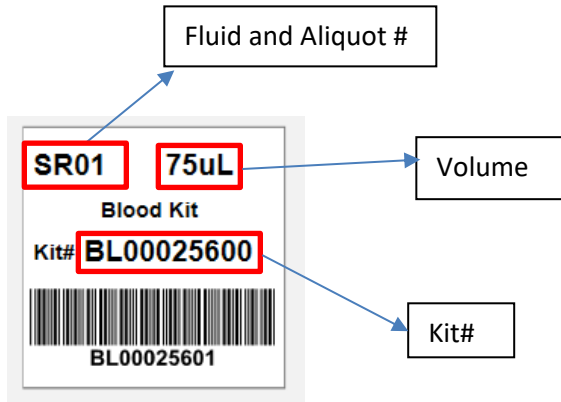

Here is a picture of a kit for one patient at one time point.

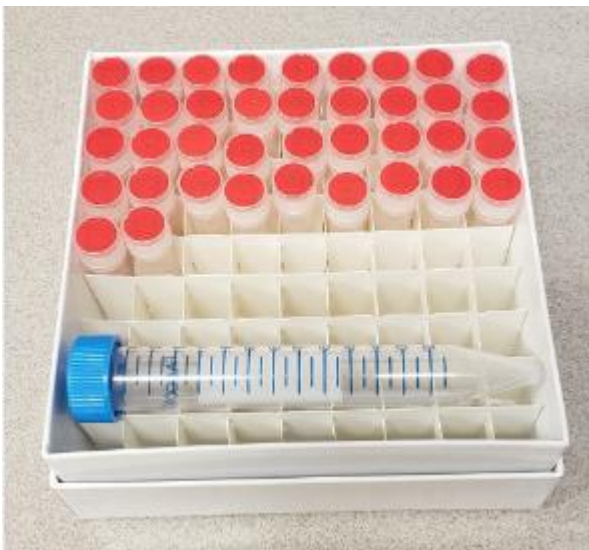

Research blood (serum and DNA) will be collected at three time points: Baseline, 3 month and 12 month visits. Serum tubes will be collected at all three time points and EDTA (DNA) will only be collected one time at baseline. If EDTA (DNA) cannot be obtained at baseline, it will be collected at the 3 or 12 month visits.

### ***Serum Processing (Red Non-additive Blood Tubes)***

1. Draw two red non-additive blood tubes. Mix blood thoroughly after draw and leave red top blood tubes **upright at room temperature for at least 45 minutes** (this allows the clot to form). Tubes can be refrigerated after the 45 minutes until centrifugation.
2. Centrifuge at 1200 g (rcf) for 10 minutes at room temperature with NO brake. (This can be done at the same time as the plasma step).
3. Use one 15 mL conical tube and transfer serum (upper layer) from both tubes using the transfer pipet tip and mix only if both are not hemolyzed (not reddish).  
Leave approximately ¼ inch to avoid red blood cell contamination. Serum should be free of hemolysis. If the sample is hemolyzed (reddish in color), aliquot the non-hemolyzed sample first, and then finish with the hemolyzed sample. If both samples are hemolyzed, combine into one conical, mix and aliquot. Hemolysis is defined as any ruptured red blood cell contamination or red tinted serum. If a gel-like mass is present, pierce gently with a pipette tip and re-centrifuge for 5 minutes at same speed in step 2.
4. Aliquot the serum from the conical tube in numerical order (ex: SR01, SR02, SR03..etc) into the red capped vials as follows:

| <u>Vial #s</u> | <u>Volumes</u> |
|----------------|----------------|
| SR01-06        | 75 uL          |
| SR11-16        | 165 uLs        |
| SR17-20        | 265 uLs        |
| SR21 & up      | 515 uLs        |

Make sure all aliquots have the volume specified on the tube. If extra serum, do not place in new tube, increment it in the few previous tubes

5. Record all data in the sample ID Sheets. Freeze serum specimens below  $-70^{\circ}\text{C}$  no more than **4 hours** after the blood draw. Serum aliquots can be temporarily stored on wet ice until able to freeze at  $-70^{\circ}\text{C}$  or colder.

### ***DNA (Buffy Coat) Processing (Lavender EDTA Blood Tubes)***

1. Centrifuge at 1200 g for 10 minutes at RT. This spin can be performed at the same time as step 4 for processing the serums. The slow brake enables the buffy coat to separate for easier processing. If your centrifuge doesn't have "no brake", please use the slowest brake. After centrifugation, the sample should separate into 3 layers: top layer is the plasma, middle thin white layer is the buffy coat and the bottom layer is the red blood cells.

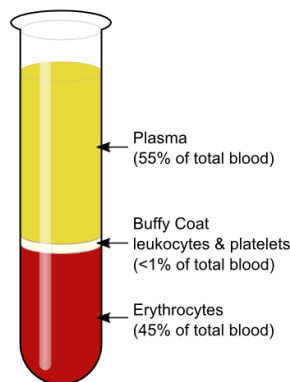

2. Using a transfer pipet, pipet off plasma leaving the last ¼ inch and discard. Then using the same transfer pipet, transfer the entire white buffy coat into the bar-coded 15 mL conical tube labeled "BUFFY1 coat." To get the entire buffy coat, **you will need to take the remaining plasma and**

**the top half of red blood cells.** If you are not sure you got **ALL** of the WBCs and remaining red blood cells, take everything that is left in the tube.

3. Freeze serum specimens below  $-70^{\circ}\text{C}$  no more than **4 hours** after the blood draw. Buffy Coats (WBC) can be temporarily stored on wet ice until able to freeze at  $-70^{\circ}\text{C}$  or colder.

### ***Storage***

All cryovials (serum and urine) and DNA conical tubes can be stored in the same 81 place white box. Please place samples in box starting at top left to top right and so on. You will have one box per patient. It is okay to combine patients into one box as long as it is properly labeled.

### **Stool Protocol**

Stool will be collected for testing fecal elastase for pancreatic function as an indicator for Exocrine Pancreas Insufficiency. Additional stool will be saved and may be used in the future for microbiome related studies.

Every patient will be given a stool kit with three different collection storage methods. Upon collection, they will ship the samples to University of Pittsburgh. The Easy Sampler will be stored in the freezer and batch shipped to Joli Diagnostics for fecal elastase testing. The snap container and the DNA/RNA Shield will be used for future research.

### **Materials (provided)**

1. EZ Sampler (ALPCO # 58EZSAMPLER)
2. Snap containers (LACONS 150600)
3. DNA/RNA Shield fecal collection tube (Zymo cat# R1101)
4. 2 instant ice packs
5. Insulated shipping container (Therapak 56442)
6. Instructions for the patient on how to collect and ship samples to University of Pittsburgh
7. UPS Shipping label
8. UPS label pouch

Patients will be instructed to ship within 24 hours of collection.

If applicable, here are storage conditions for each of the collection tube types

| <b><u>Stool Tube Type</u></b>        | <b><u>Storage Temperatures</u></b>     |
|--------------------------------------|----------------------------------------|
| EZ Sampler                           | keep in fridge ( $4^{\circ}\text{C}$ ) |
| Snap containers                      | keep frozen ( $-20^{\circ}\text{C}$ )  |
| DNA/RNA Shield fecal collection tube | keep cold ( $4^{\circ}\text{C}$ )      |
